# Supplementary material for: A gold nanoparticle-based semi-quantitative and quantitative ultrasensitive paper sensor for the detection of twenty mycotoxins
Source: Royal Society of Chemistry journal article supplement (doi:10.1039/c5nr09171c), 2016-01-01
Supplement: c5nr09171c1.pdf [file c5nr09171c1.pdf]

**Supporting information**

**Gold nanoparticle-based semi-quantitative and  
quantitative ultrasensitive paper sensor for the  
detection of twenty mycotoxins**

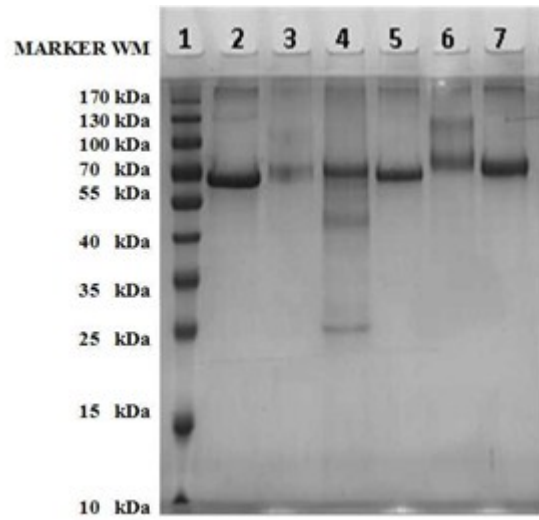

**Figure S1.** The SDS-PAGE image of five coating antigens. 1. MARKER; 2. BSA; 3. DON-BSA; 4. FB1-GA-BSA; 5. ZEA-CMO-BSA; 6. T-2-HS-BSA; 7. AFB1-CMO-BSA

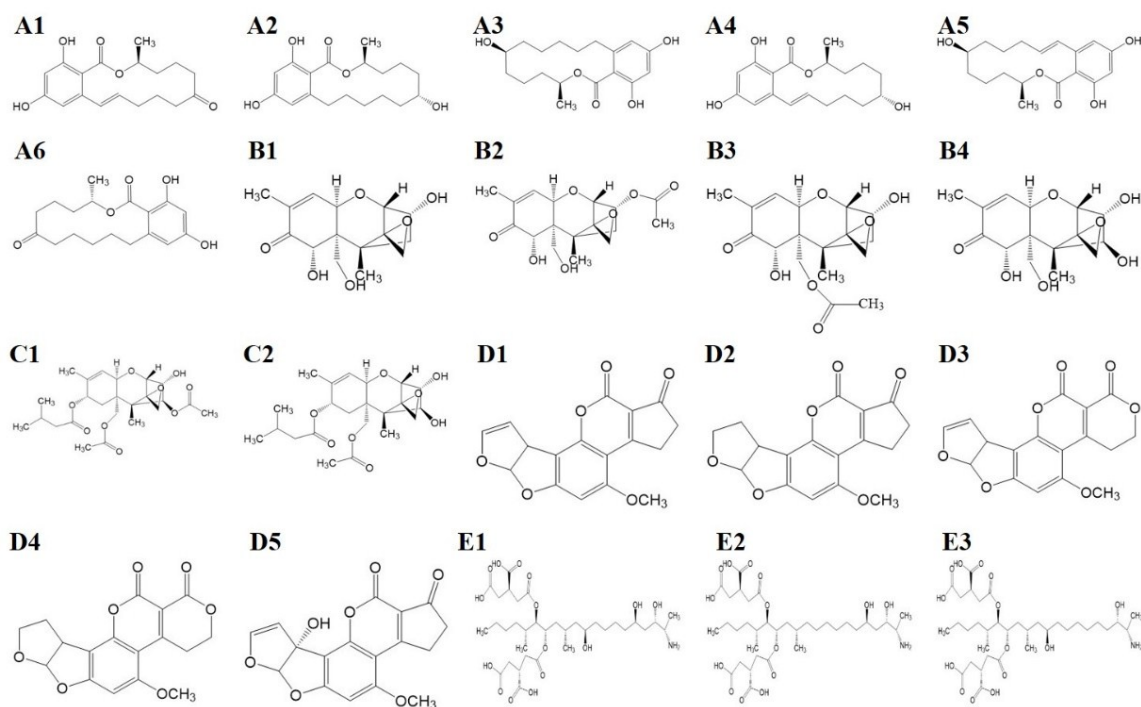

**Figure S2.** Chemical structures of different mycotoxins. (A1) ZEA; (A2) alpha-ZAL; (A3) beta-ZAL; (A4) alpha-ZOL; (A5) beta-ZOL; (A6) zearalanone; (B1) DON; (B2) 3-AC-DON; (B3) 15-AC-DON; (B4) NIV; (C1) T-2 Toxin; (C2) HT-2 Toxin; (D1) AFB1; (D2) AFB2; (D3) AFG1; (D4) AFG2; (D5) AFM1; (E1) FB1; (E2) FB2; (E3) FB3.

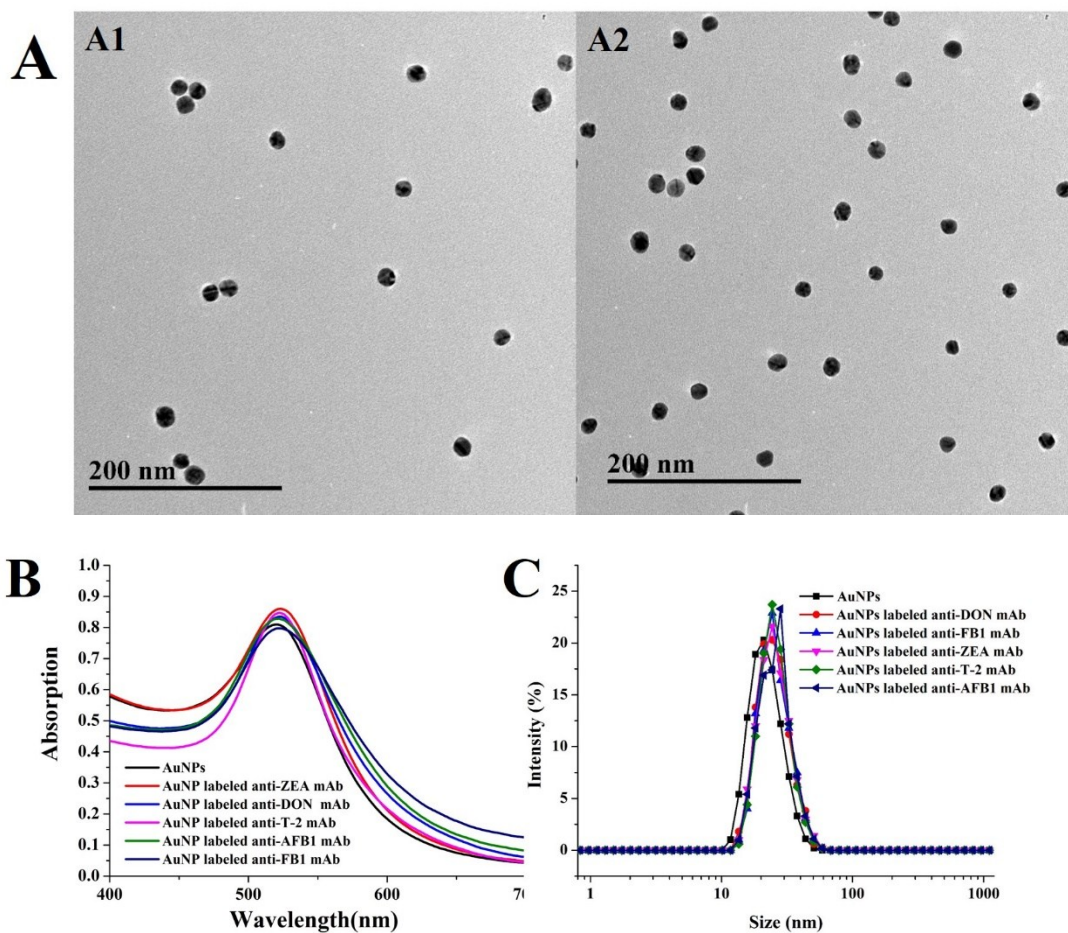

**Figure S3.** (A1) The TEM images of GNPs with diameter of 15 nm; (A2) The TEM images of GNP labeled anti-ZEA mAb; (B) UV-Vis spectra of the GNP labeled mAb. (C) The dynamic light scattering (DLS) diameter of the GNP labeled mAb.

**Table S1.** The conjugated ratio for each coating antigens.

| Coating antigens | MW (Da) | Conjugated ratio |
|------------------|---------|------------------|
| DON-BSA          | 77285   | 36.6             |
| FB1-GA-BSA       | 76343   | 12.6             |
| ZEA-CMO-BSA      | 74265   | 20.0             |
| T-2-HS-BSA       | 82162   | 27.8             |
| AFB1-CMO-BSA     | 78237   | 29.4             |

**Table S2.** The IC<sub>50</sub> values and CR values of each mAb determined by the Ic-ELISA method

| Analytes | Analogue    | IC <sub>50</sub> (Ic-ELISA)<br>(µg/kg) | CR (%) |
|----------|-------------|----------------------------------------|--------|
| ZEA      | -           | 0.045                                  | 100%   |
|          | alpha-ZAL   | 0.080                                  | 56%    |
|          | beta-ZAL    | 0.058                                  | 78%    |
|          | alpha-ZOL   | 0.073                                  | 62%    |
|          | beta-ZOL    | 0.033                                  | 136%   |
|          | Zearalanone | 0.033                                  | 136%   |
| DON      | -           | 2.8                                    | 100%   |
|          | 3-AC-DON    | 0.58                                   | 483%   |
|          | 15-AC-DON   | 7.5                                    | 37.3%  |
|          | NIV         | 35                                     | 8%     |
| T-2      | -           | 0.43                                   | 100%   |
|          | HT-2        | 1.5                                    | 29%    |
| AFB1     | -           | 0.013                                  | 100%   |
|          | AFB2        | 0.062                                  | 21%    |
|          | AFG1        | 0.082                                  | 16%    |
|          | AFG2        | 0.414                                  | 3.2%   |
|          | AFM1        | 0.031                                  | 42%    |
| FB1      | -           | 2.17                                   | 100%   |
|          | FB2         | 7.14                                   | 30.4%  |
|          | FB3         | 2.24                                   | 97%    |
